# Supplementary material
Source: Springer Nature journal article supplement (https://www.springermedizin.de/resource/supplementary/12916_2012_839_MOESM1_ESM.pdf/9598412)

## Sunlight/Skin Synthesis

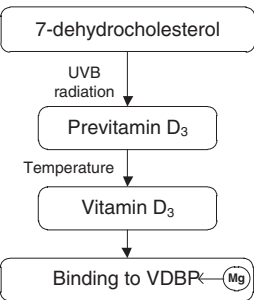

## Dietary Sources Vitamin D<sub>3</sub> / D<sub>2</sub>

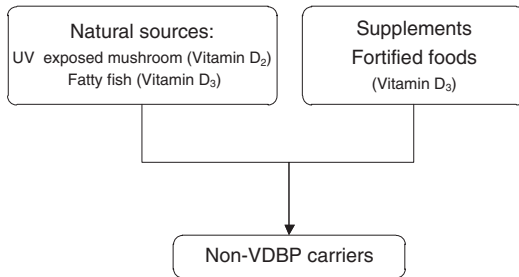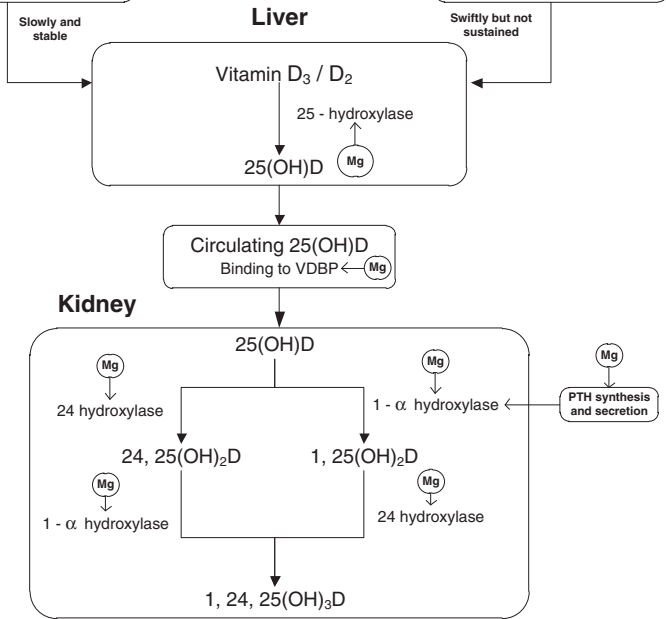

Supplement: MOESM1 [file 9598412]
